# Supplementary material for: Comparison between Fasting and Non-Fasting Cut-Off Values of Triglyceride in Diagnosing High Triglyceride in Chinese Hypertensive Outpatients
Source: MDPI journal article supplement (doi:10.3390/jcm12072539), 2023-03-28
Supplement: s1 [file s1]

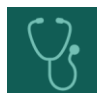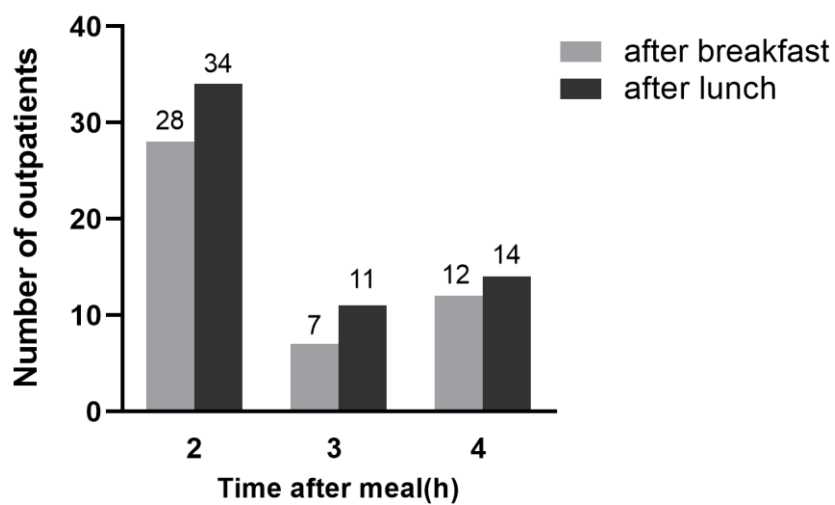

**Figure S1.** Comparisons of the number of HBP outpatients with non-fasting lipid test at different time points after breakfast or lunch.
